CORRECTION

# Correction: A comment on priors for Bayesian occupancy models

Joseph M. Northrup, Brian D. Gerber

Our original paper [1] omits a reference to a non-peer-reviewed preprint [2] that discusses similar issues. The work by Lele [2] illustrates how priors in Bayesian analysis can impact inference in general and provides cautionary advice about the use of non-informative priors in analyses used for wildlife management. Similar to our paper, Lele [2] shows how seemingly non-informative priors can influence inference in occupancy models. Our work [1] builds on this research by further exploring this issue with simulation and an empirical example, describing in plain language the reasons that seemingly non-informative priors can influence inference, and providing potential alternative priors that can be used to provide the inference often desired by researchers.

## References

1. Northrup JM, Gerber BD (2018) A comment on priors for Bayesian occupancy models. PLoS ONE 13(2): e0192819. <https://doi.org/10.1371/journal.pone.0192819> PMID: 29481554
2. Lele SR (2015) Is non-informative Bayesian analysis appropriate for wildlife management: survival of San Joaquin Kit Fox and declines in amphibian populations. arxiv.1502.00483

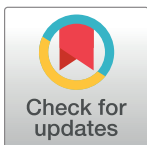

## OPEN ACCESS

**Citation:** Northrup JM, Gerber BD (2019) Correction: A comment on priors for Bayesian occupancy models. PLoS ONE 14(2): e0212346. <https://doi.org/10.1371/journal.pone.0212346>

**Published:** February 8, 2019

**Copyright:** © 2019 Northrup, Gerber. This is an open access article distributed under the terms of the [Creative Commons Attribution License](https://creativecommons.org/licenses/by/4.0/), which permits unrestricted use, distribution, and reproduction in any medium, provided the original author and source are credited.
